# Supplementary material for: FLII Modulates the Myogenic Differentiation of Progenitor Cells via Actin Remodeling-Mediated YAP1 Regulation
Source: MDPI journal article supplement (doi:10.3390/ijms241814335), 2023-09-20
Supplement: s1 [file s1]

**Table S1. Oligonucleotide sequences for transfection**

| Gene                | Oligonucleotide sequence (5'-3') |
|---------------------|----------------------------------|
| scRNA (control RNA) | UCACAACCUCCUAGAAAGAGUAGA         |
| siFLII              | CUGAACUGGGAGAUCUACU              |
| siFLII2             | GCCCACGGGAGCUGGAGAAU             |

**Table S2. Primer list and conditions for *q*RT-PCR**

| Gene  | Primer sequence (5'-3') |                         | Product size | Annealing Temperature | Concentration |        | Cycle |
|-------|-------------------------|-------------------------|--------------|-----------------------|---------------|--------|-------|
|       |                         |                         |              |                       | cDNA          | Primer |       |
| U6    | F.P                     | CTCGCTTCGGCAGCACA       | 100          | 58                    | 2 ng/μl       | 0.5 μM | 40    |
|       | R.P                     | AACGCTTCACGAATTTGCGT    |              |                       |               |        |       |
| PCNA  | F.P                     | GAACCTGCAGAGCATGGACTC   | 201          | 58                    |               |        |       |
|       | R.P                     | GGTGTCTGCATTATCTTCAGCCC |              |                       |               |        |       |
| CCND1 | F.P                     | ACCAATCTCCTCAACGACCG    | 228          | 58                    |               |        |       |
|       | R.P                     | ACGGAAGGGAAGAGAAGGG     |              |                       |               |        |       |
| CCNB1 | F.P                     | GAGCTATCCTCATTGACTGG    | 125          | 58                    |               |        |       |
|       | R.P                     | CATCTTCTTGGGCACACAAC    |              |                       |               |        |       |

**Table S3. Antibodies list**

| Antibody                              | Type       | Targeted species | Manufacturer                                | Cat. No.  | Dilution ratio* |
|---------------------------------------|------------|------------------|---------------------------------------------|-----------|-----------------|
| FLII                                  | Monoclonal | Mouse            | Santa Cruz Biotechnology, Dallas, TX, USA   | sc-21716  | 1:5,000         |
| MyHC                                  | Monoclonal | Mouse            | DSHB, Iowa, IA, USA                         | MF20      | 1:1,000         |
| MyoD                                  | Monoclonal | Mouse            | Santa Cruz Biotechnology, Dallas, TX, USA   | sc-377460 | 1:1,000         |
| MyoG                                  | Monoclonal | Mouse            | Santa Cruz Biotechnology, Dallas, TX, USA   | sc-12732  | 1:1,000         |
| YAP1                                  | Monoclonal | Rabbit           | Cell Signaling Technology, Danvers, MA, USA | 14074S    | 1:10,000        |
| pYAP1                                 | Polyclonal | Mouse            | Cell Signaling Technology, Danvers, MA, USA | 4911S     | 1:10,000        |
| Lamin B2                              | Monoclonal | Rabbit           | Abcam, Cambridge, United Kingdom            | ab151735  | 1:2,500         |
| $\alpha$ -Tubulin                     | Monoclonal | Mouse            | DSHB, Iowa, IA, USA                         | 12G10     | 1:2,000         |
| $\beta$ -actin                        | Monoclonal | Rabbit           | Sigma-Aldrich Chemical, St. Louis, USA      | A2066     | 1:10,000        |
| Antibodies HRP-linked anti-rabbit IgG |            |                  | Cell Signaling Technology, Danvers, MA, USA | #7074     | 1:10,000        |
| Goat anti-mouse(H+L)                  |            |                  | Thermofisher Sci., Waltham, MA, USA         | #32430    | 1:2,000         |

\*All blots were visualized using a Femto reagent (Thermofisher Scientific).
